# Supplementary material for: The OH * (3–1) layer emission altitude cannot be determined unambiguously from temperature comparison with lidars
Source: Copernicus journal article supplement (doi:10.5194/acp-2017-360), 2017-08-15
Supplement: Supplementary file 1 [file acp-2017-360-supplement.zip]

Archive with 2 entries (2 files):
- lidar_measurements.csv
- supplement.pdf
