# Supplementary material for: The OH * (3–1) layer emission altitude cannot be determined unambiguously from temperature comparison with lidars
Source: Copernicus journal article supplement (doi:10.5194/acp-2017-360), 2017-08-15
Supplement: Supplementary file 1 [file acp-2017-360-supplement.zip › lidar_measurements.csv]

# Columns:
# 0: measurement number
# 1: date in ISO 8601 format
# 2: measurement start in Julian days
# 3: measurement number in Julian days
# 4: measurement duration in decimal hours
#
# This is a comma-separated list of all measurements included in the manuscript. The measurement number is used in Fig. 2 in the manuscript.
# The date refers to the date the measurement was started. The measurement duration	given in decimal hours	is not the difference between start and stop of a measurement	because this may include stops due to weather conditions	for example. It is the sum of the useable individual profiles	multiplied with the temporal resolution of the measurement.
00	2010-11-23	2455524.3238	2455524.3619	0.89
01	2010-11-26	2455527.1932	2455527.4669	5.91
02	2010-12-04	2455535.3140	2455535.4565	2.78
03	2010-12-05	2455536.2761	2455536.4422	3.62
04	2010-12-05	2455535.6478	2455535.7345	1.78
05	2010-12-07	2455538.0596	2455538.2748	3.67
06	2010-12-13	2455543.5866	2455543.8022	4.36
07	2011-02-14	2455607.2467	2455607.7447	10.71
08	2011-03-11	2455632.3214	2455632.4812	3.82
09	2011-04-05	2455657.3795	2455657.4684	1.42
10	2011-09-02	2455807.4206	2455807.4727	1.30
11	2011-09-03	2455808.3991	2455808.4930	2.17
12	2011-10-11	2455846.3252	2455846.4189	1.93
13	2011-12-08	2455904.1274	2455904.4670	7.34
14	2011-12-09	2455905.0508	2455905.3836	7.20
15	2011-12-13	2455909.2430	2455909.4540	4.58
16	2011-12-16	2455912.2240	2455912.3594	2.98
17	2012-01-06	2455933.2985	2455933.4963	4.29
18	2012-01-19	2455946.3382	2455946.4761	2.91
19	2012-01-21	2455948.2606	2455948.7979	10.38
20	2012-01-22	2455949.1500	2455949.7886	13.76
21	2012-01-24	2455951.2163	2455951.3552	3.03
22	2012-02-01	2455959.3705	2455959.4428	1.61
23	2012-03-20	2456007.4371	2456007.6102	4.07
24	2013-04-13	2456396.3512	2456396.5858	2.96
25	2013-09-02	2456538.2813	2456538.4305	3.40
26	2013-09-18	2456554.3586	2456554.6392	6.65
27	2013-09-23	2456559.3125	2456559.4098	2.38
28	2013-09-24	2456560.2845	2456560.4513	4.00
29	2013-09-27	2456563.2359	2456563.4542	5.20
30	2013-11-08	2456605.1847	2456605.3167	3.17
31	2013-12-06	2456633.1020	2456633.7957	13.75
32	2013-12-08	2456635.1542	2456636.1596	14.28
33	2014-01-10	2456668.0974	2456668.4929	9.32
34	2014-01-15	2456673.1197	2456673.4826	8.12
35	2014-01-21	2456679.1684	2456679.3337	3.73
36	2014-01-22	2456680.1927	2456680.4550	5.98
37	2014-01-24	2456682.2936	2456682.4661	4.08
38	2014-01-27	2456685.2731	2456685.4433	4.07
39	2014-01-29	2456687.3936	2456687.4999	1.88
40	2014-01-30	2456688.4278	2456688.4963	1.68
41	2014-02-11	2456700.2816	2456700.4932	5.10
